# Supplementary material
Source: HighWire-hosted journal article supplement (https://bmjopen.bmj.com/content/15/3/e088505)

Supplemental Figure 1. Sample of DCE questionnaire

| Attribute                                                                                                                                                | Regimen A                                                                                                                                                  | Regimen B                                                                                                                                                   |
|----------------------------------------------------------------------------------------------------------------------------------------------------------|------------------------------------------------------------------------------------------------------------------------------------------------------------|-------------------------------------------------------------------------------------------------------------------------------------------------------------|
| Median disease-free/ event-free survival                                                                                                                 | 12 months free of cancer, recurrence, progression, complications or death.                                                                                 | 24 months free of cancer, recurrence, progression, complications or death.                                                                                  |
| Pathological complete response (pCR)                                                                                                                     | 70% probability of achieving pCR<br>                                      | 30% probability of achieving pCR<br>                                      |
| Chance of undergoing breast conserving surgery (BCS) after receiving this anticancer treatment                                                           | 70% chance of undergoing BCS<br>                                          | 30% chance of undergoing BCS<br>                                          |
| Febrile Neutropenia                                                                                                                                      | 5% risk of experiencing febrile neutropenia<br>                           | 20% risk of experiencing febrile neutropenia<br>                          |
| Peripheral sensory neuropathy                                                                                                                            | 5% risk of experiencing peripheral sensory neuropathy<br>                | 20% risk of experiencing peripheral sensory neuropathy<br>               |
| Diarrhoea                                                                                                                                                | 50% risk of experiencing diarrhea<br>                                   | 10% risk of experiencing diarrhea<br>                                   |
| Irreversible endocrine-related side effects requiring lifelong medication                                                                                | 8% chance of developing irreversible endocrine-related side effects<br> | 0% chance of developing irreversible endocrine-related side effects<br> |
| If these were your only options, which treatment regimen would you choose?<br>Select the box to indicate your choice.<br><a href="#">[Single select]</a> | <input type="checkbox"/>                                                                                                                                   | <input type="checkbox"/>                                                                                                                                    |

**Supplemental Figure 2. Relative importance of attributes in medical oncologists and surgeons.** BCS, breast-conserving surgery; DFS/ EFS, disease free survival/ event-free survival; pCR, pathological complete response.

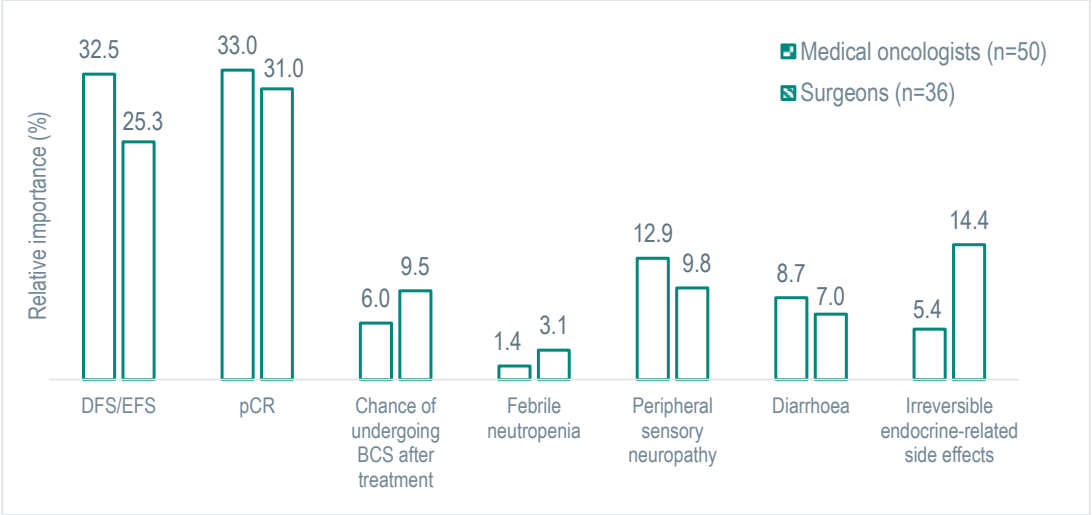

**Supplemental Figure 3. Relative importance of attributes in patients younger than and above 50 years of age.** BCS, breast-conserving surgery; DFS/ EFS, disease free survival/ event-free survival; pCR, pathological complete response.

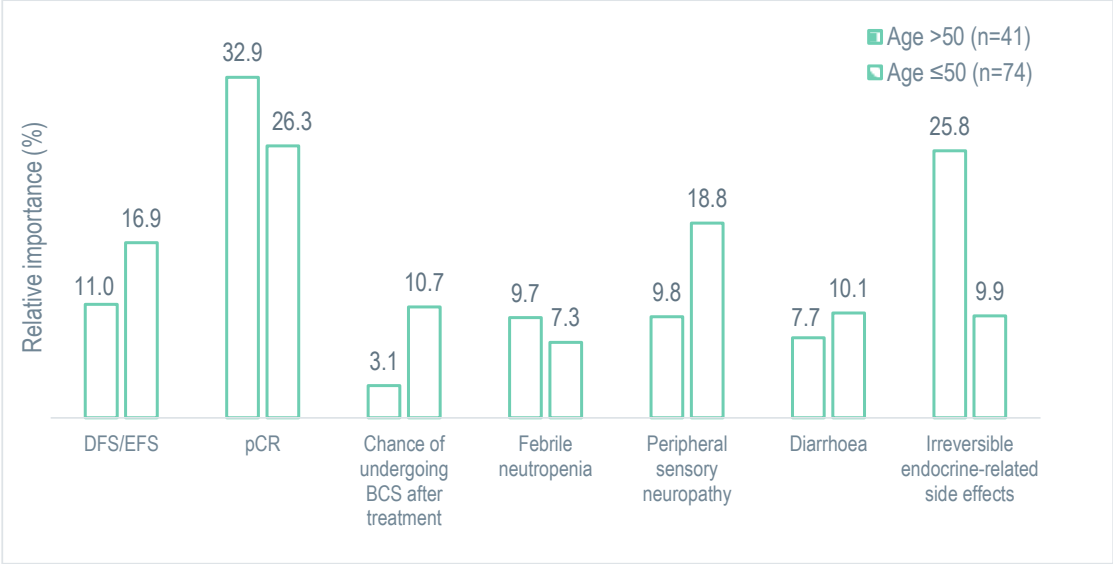

**Supplemental Figure 4. Relative importance of attributes in patients diagnosed at stage I and stages II and III.** BCS, breast-conserving surgery; DFS/ EFS, disease free survival/ event-free survival; pCR, pathological complete response.

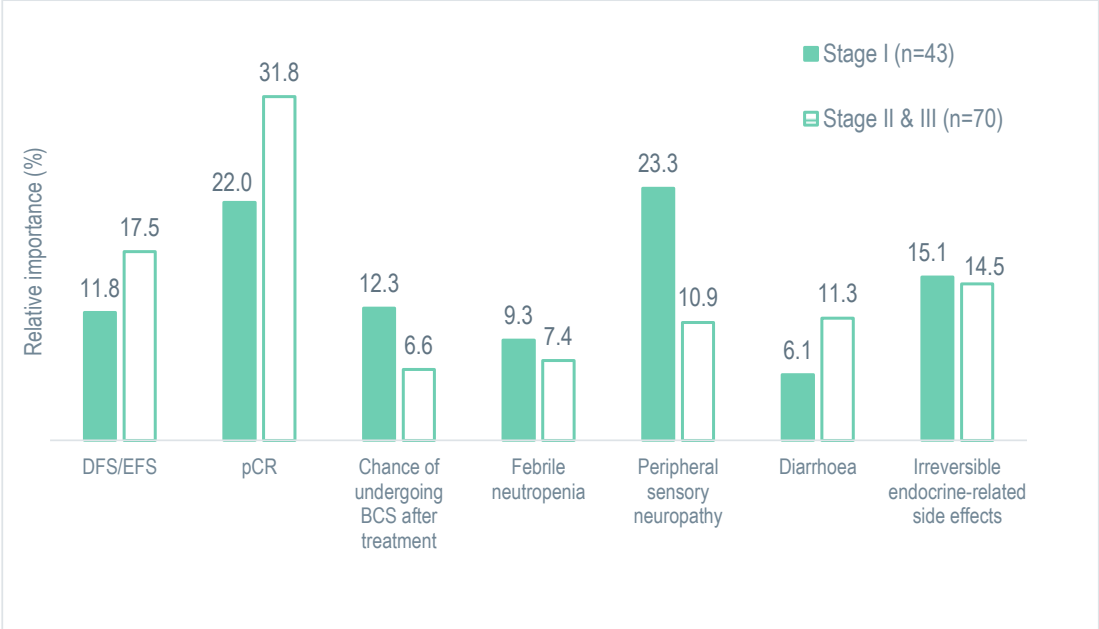

**Supplemental Figure 5. Relative importance of attributes in eTNBC patients who were diagnosed within and more than 2 years prior to study participation.** BCS, breast-conserving surgery; DFS/ EFS, disease free survival/ event-free survival; pCR, pathological complete response.

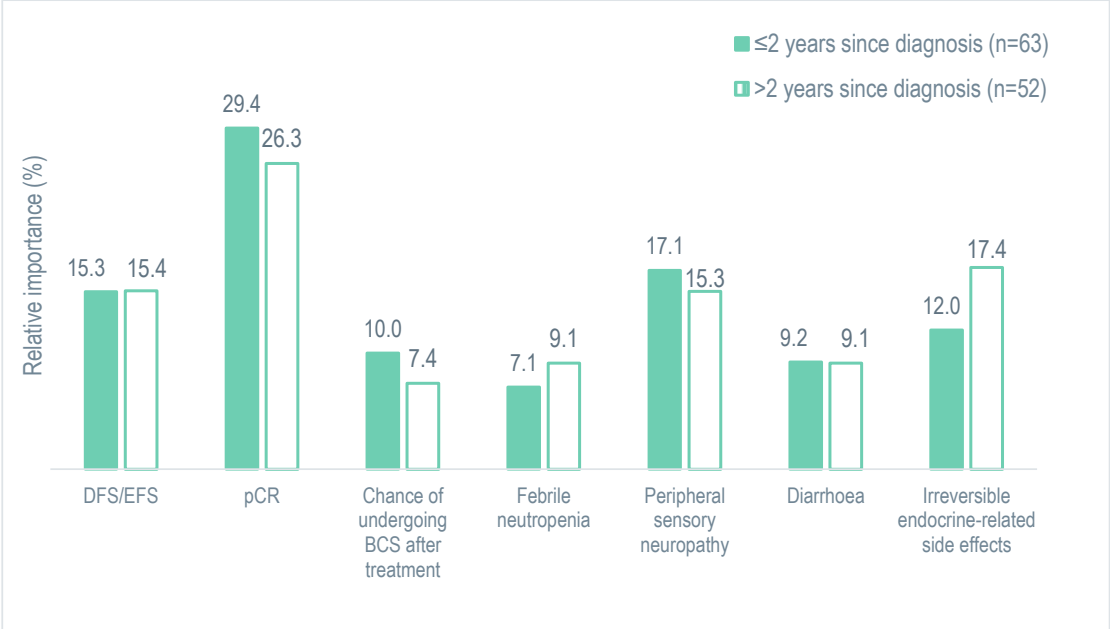

**Supplemental Figure 6. Relative importance of attributes in patients who were receiving chemotherapy and non-chemotherapy options during study participation.** Non-chemotherapy includes radiation therapy (n=3), surgery (n=6), don't know and not receiving treatment (n=37). BCS, breast-conserving surgery; DFS/ EFS, disease free survival/ event-free survival; pCR, pathological complete response.

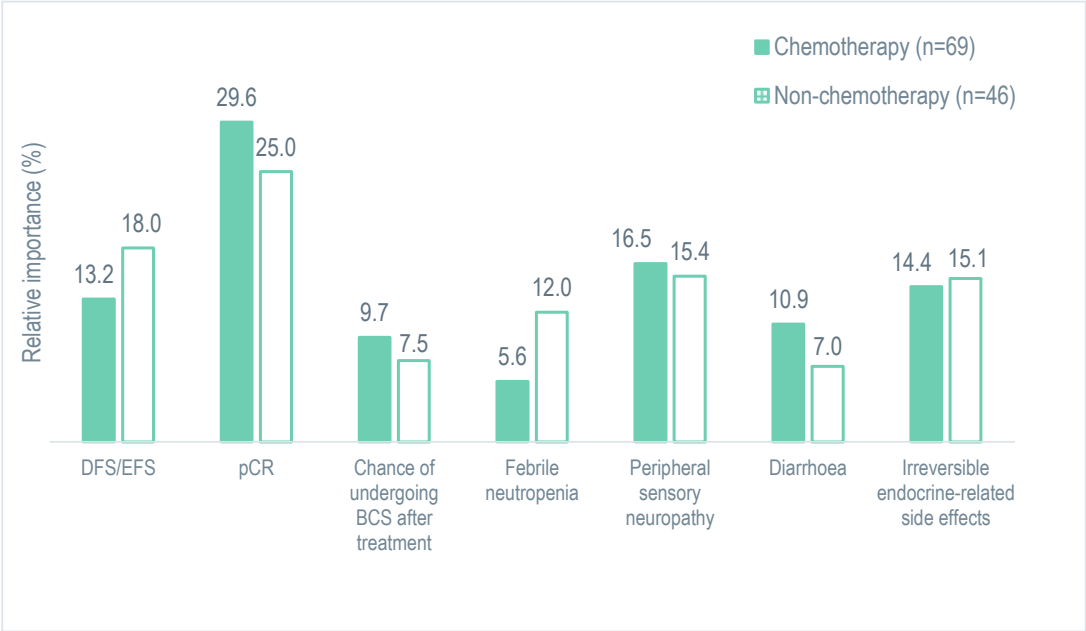

Supplement: inline-supplementary-material-1 [file inline-supplementary-material-1.pdf]
